# Supplementary material for: Translation inhibition and suppression of stress granules formation by cisplatin
Source: PubMed Central journal article supplement (PMC8782064; doi:10.1016/j.biopha.2021.112382), 2021-12-01
Supplement: NIHMS1769611-supplement-Supplementary_Material.pdf [file NIHMS1769611-supplement-Supplementary_Material.pdf]

# SiHa

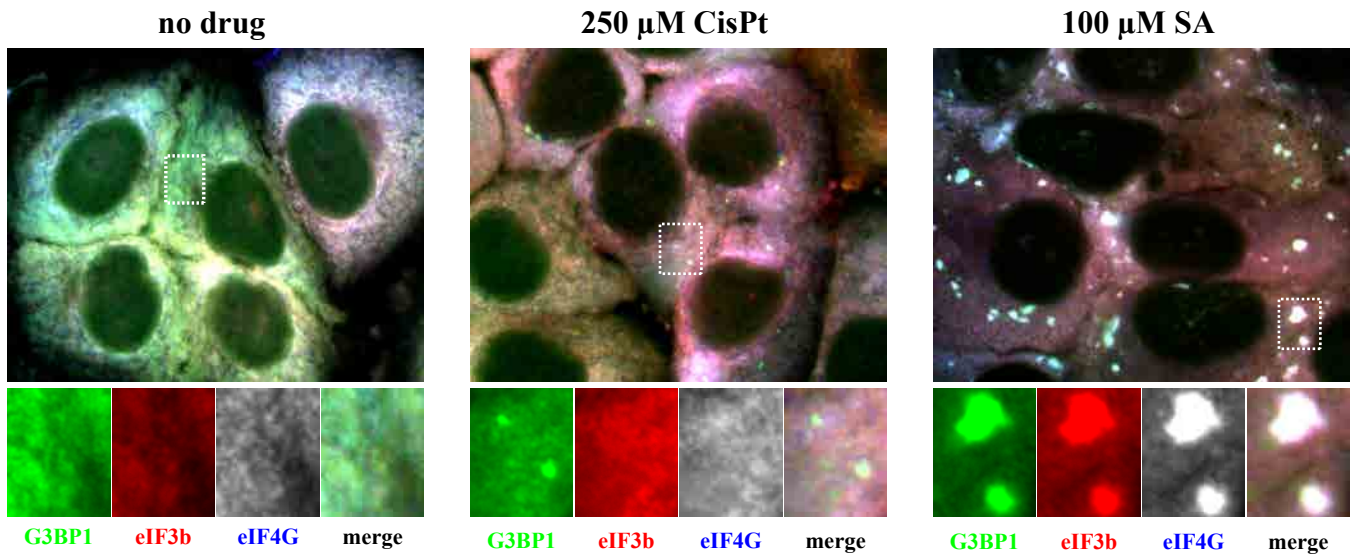

# MES-SA

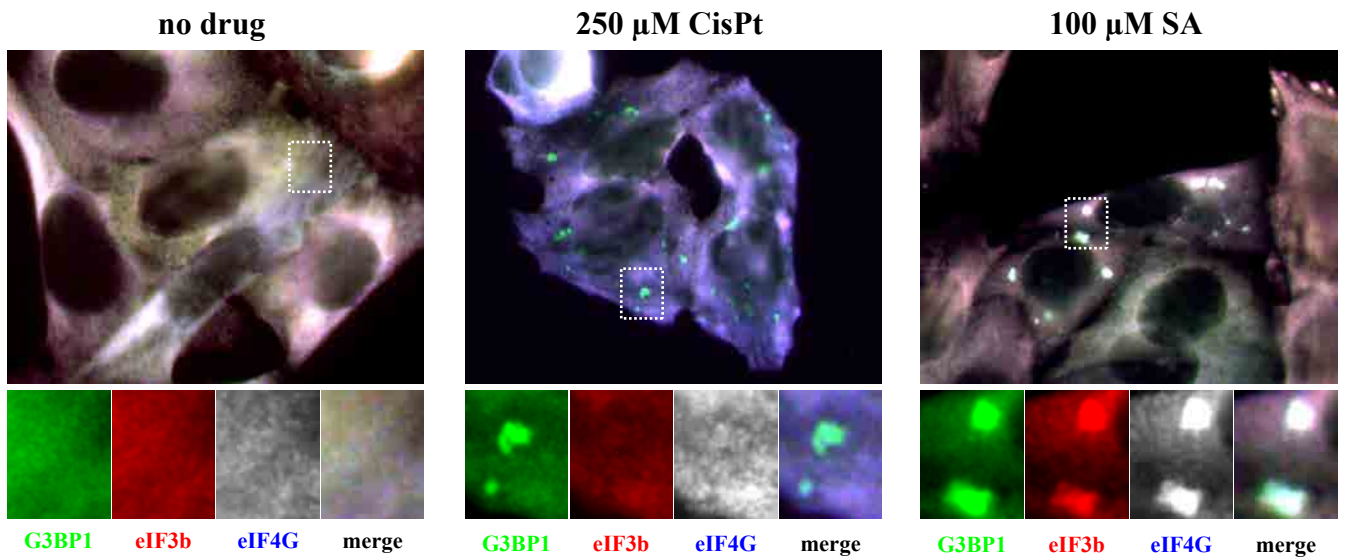

# HeLa

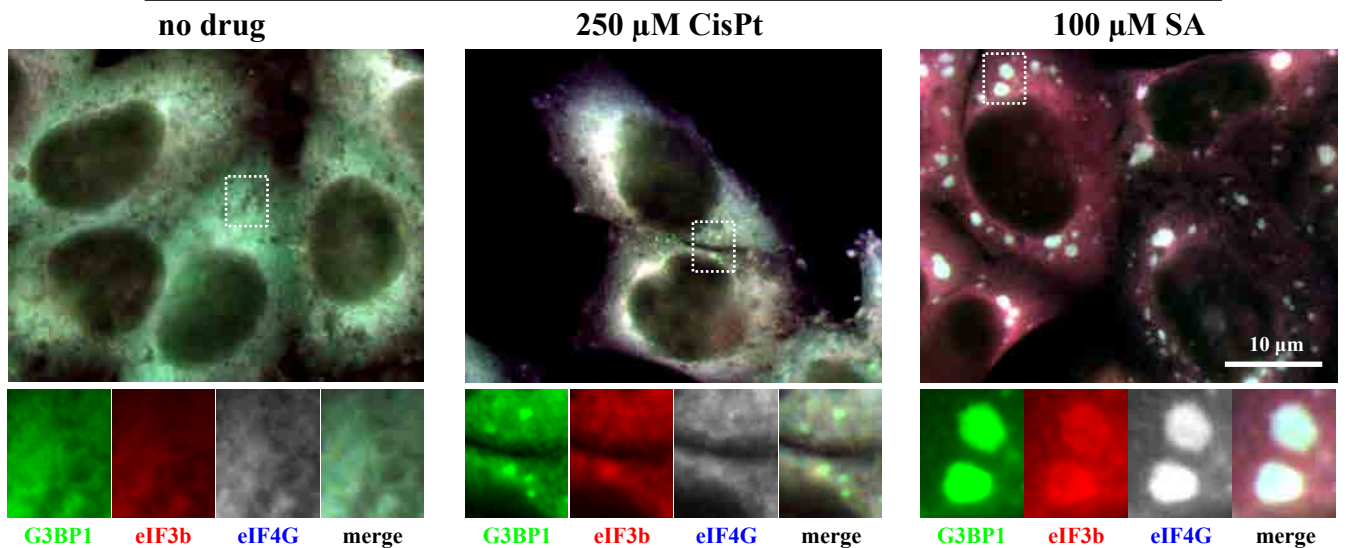

**Figure S1**

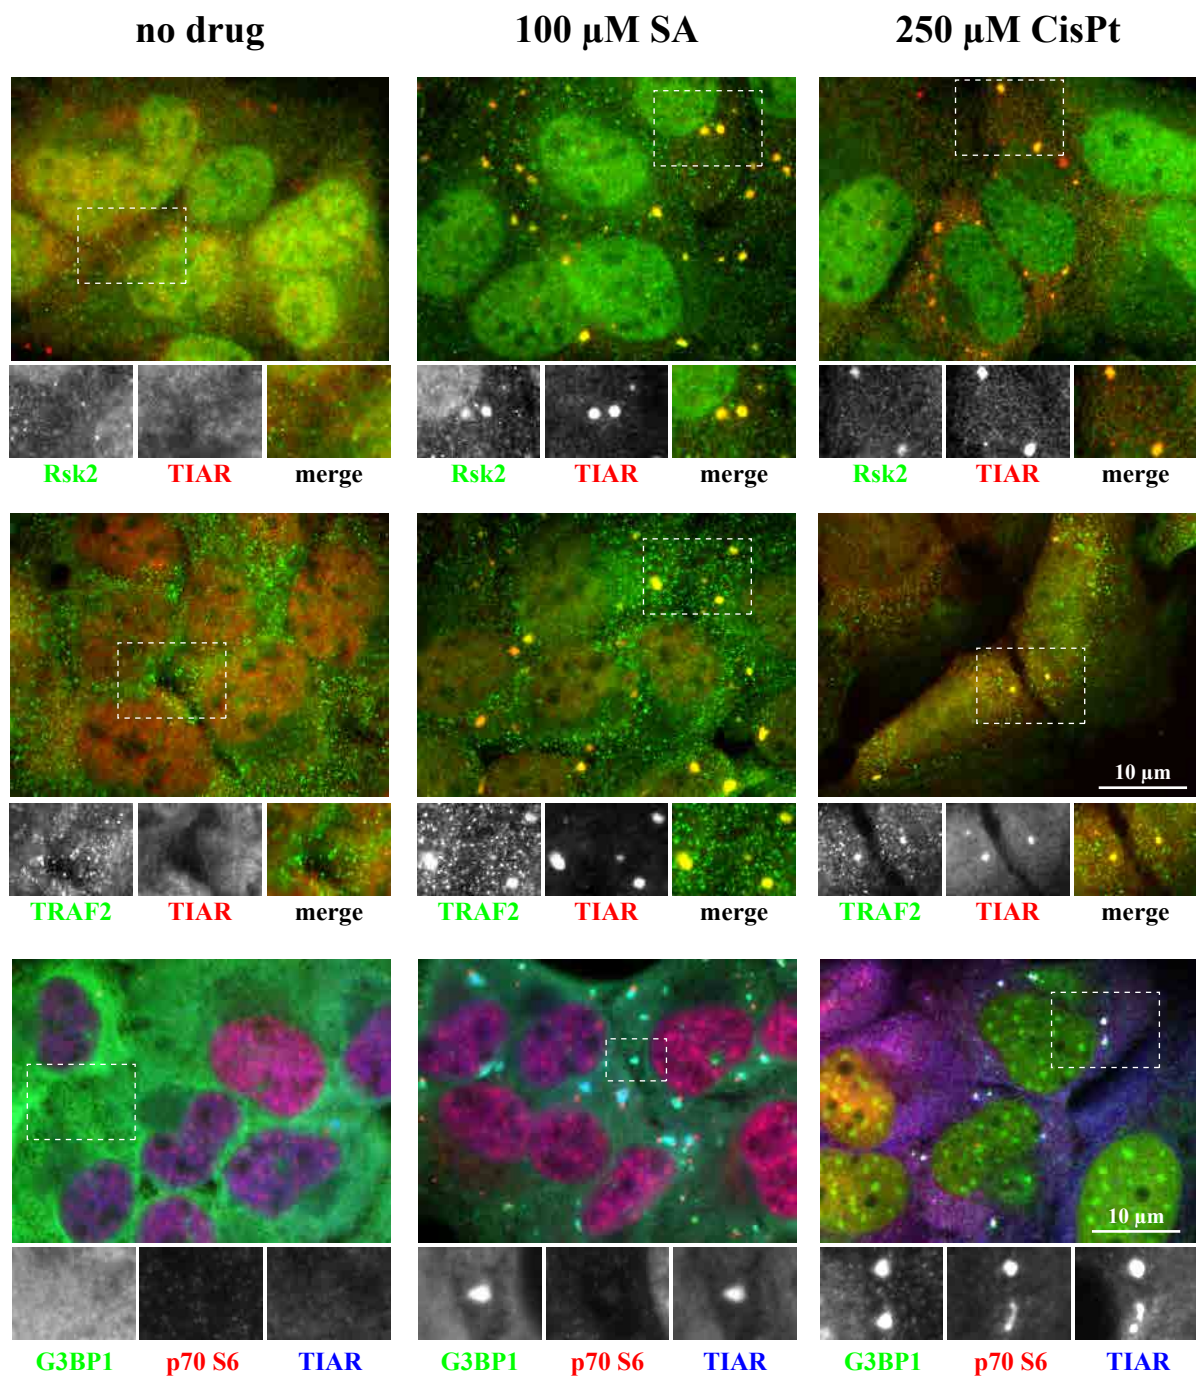

**Figure S2**



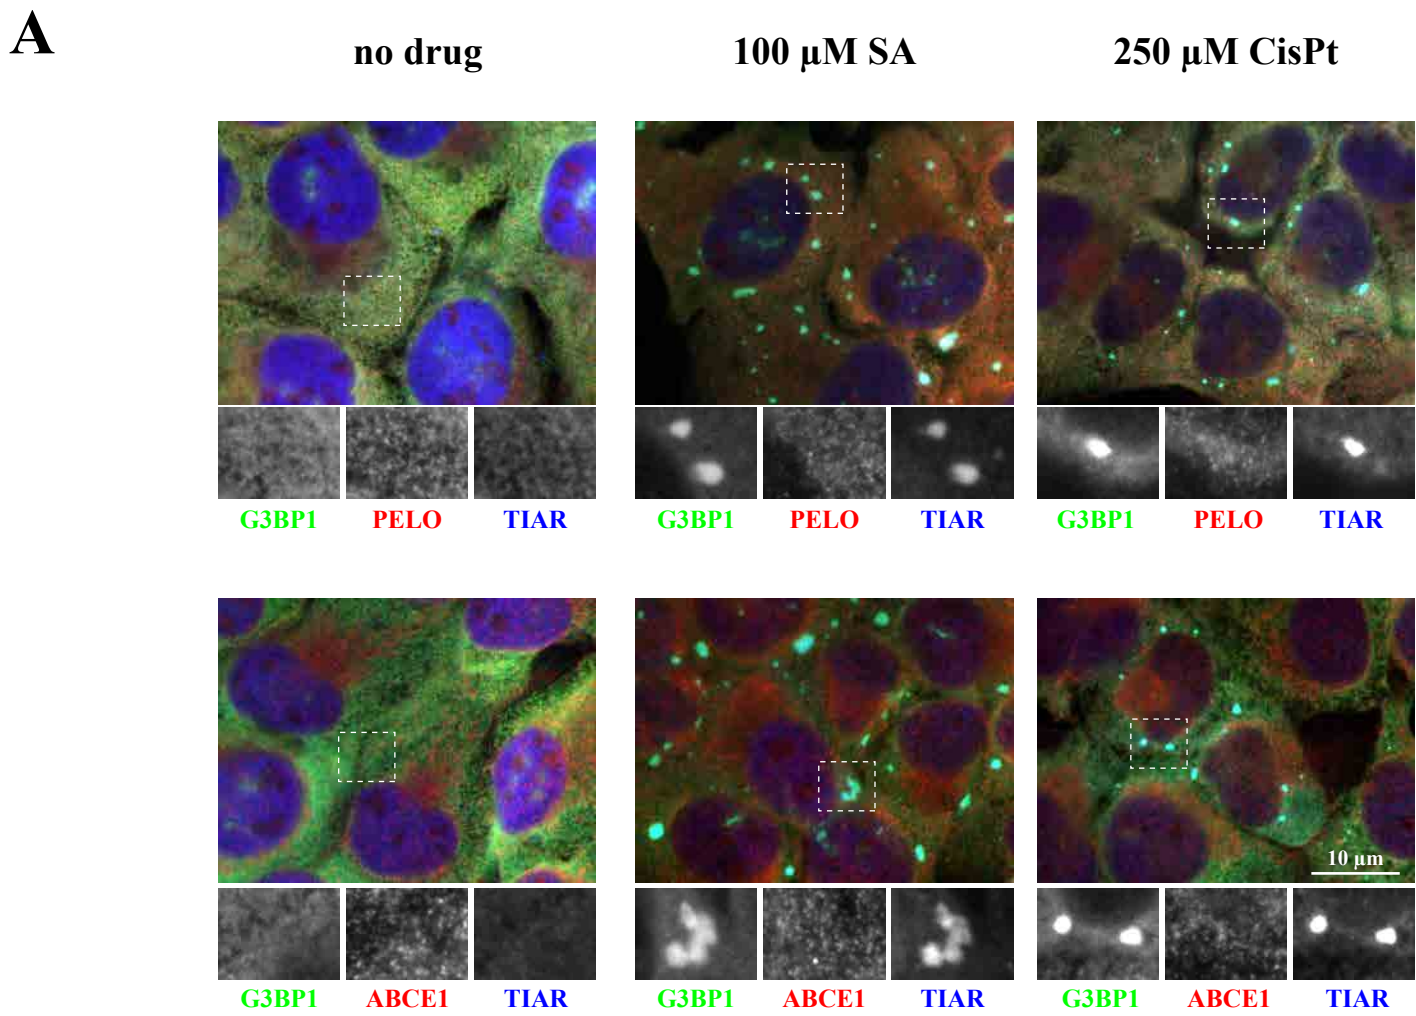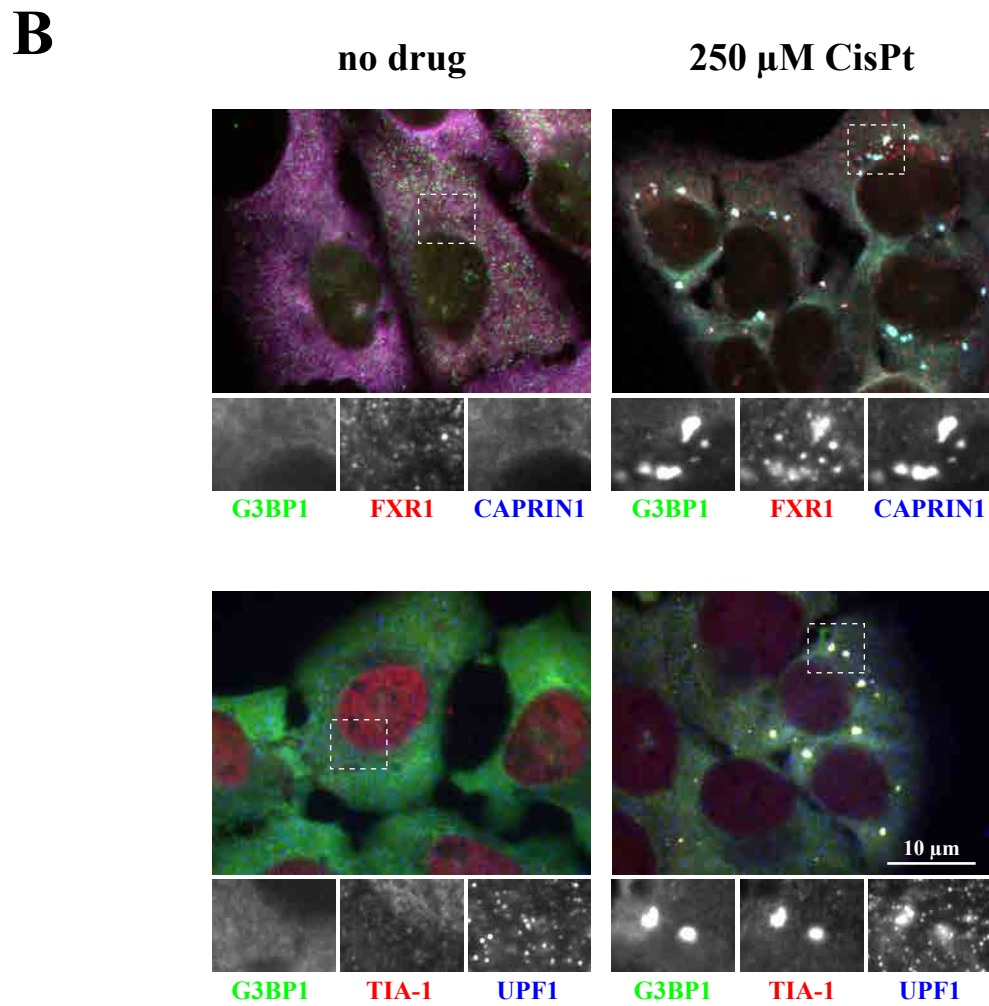

**Figure S3**

**A**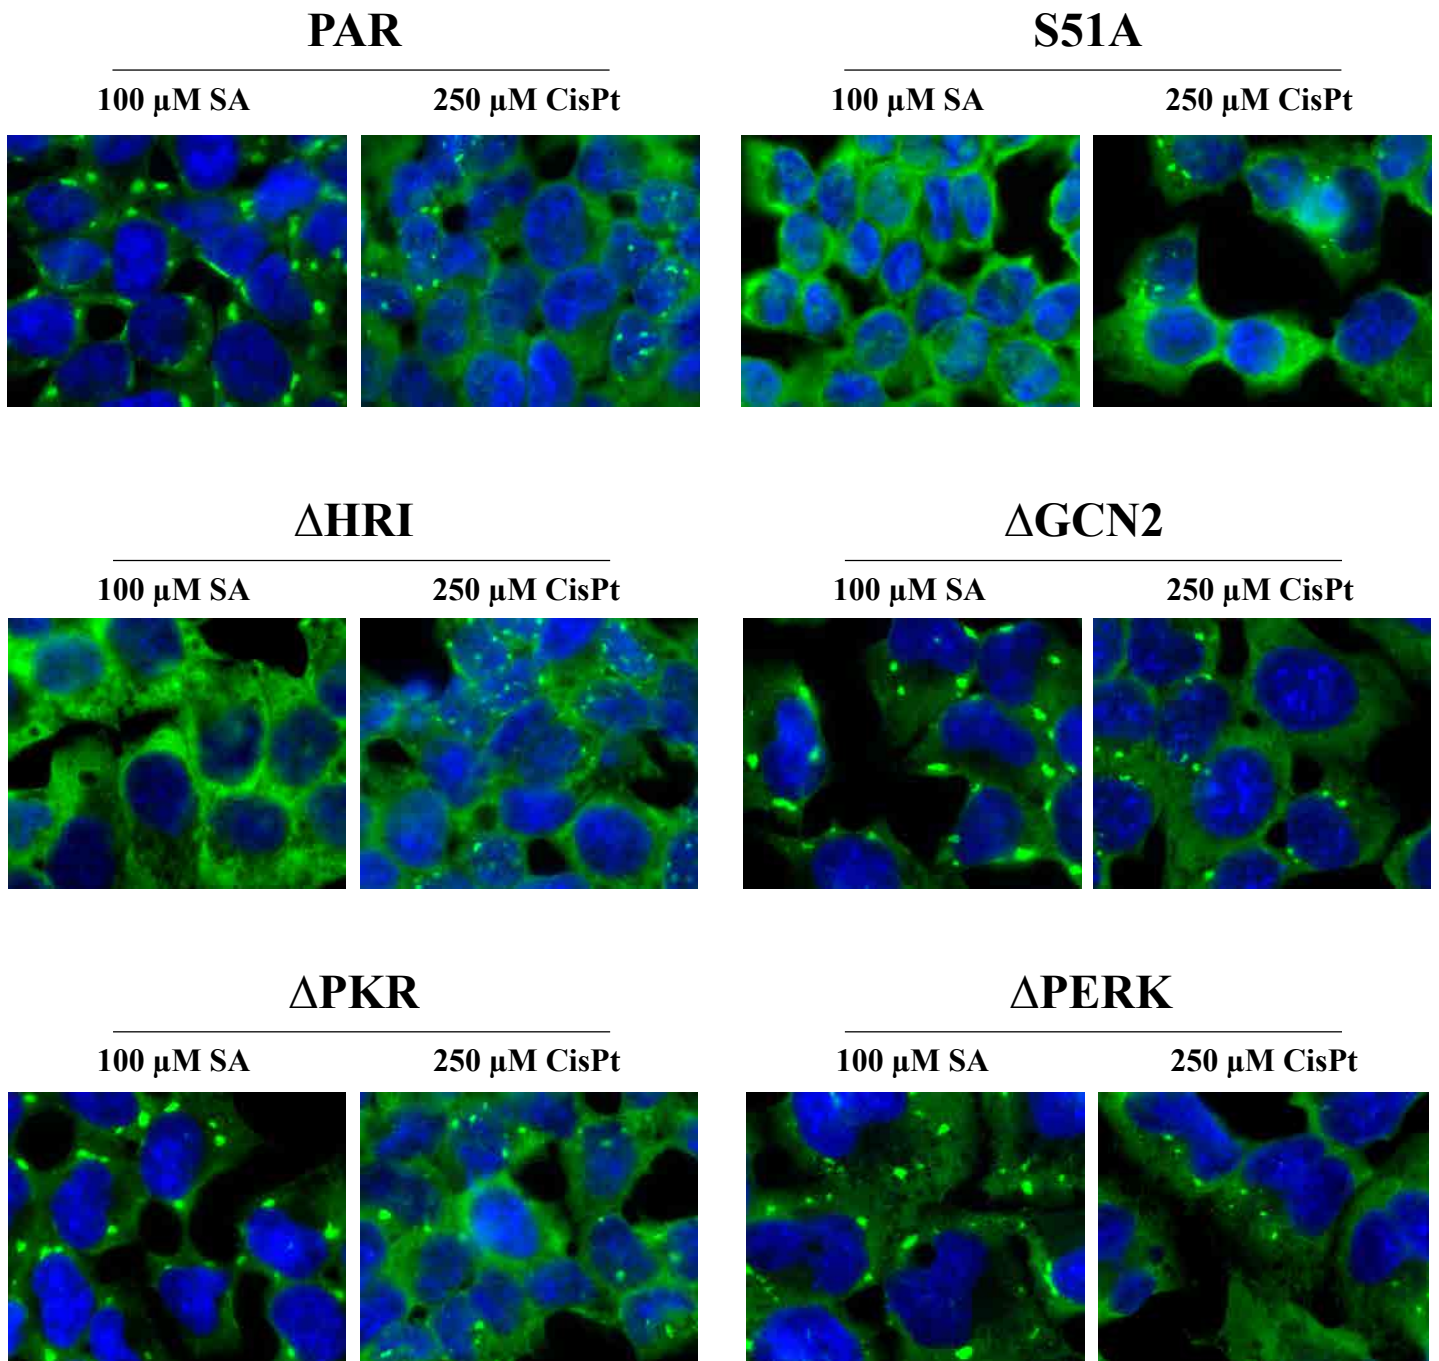**B**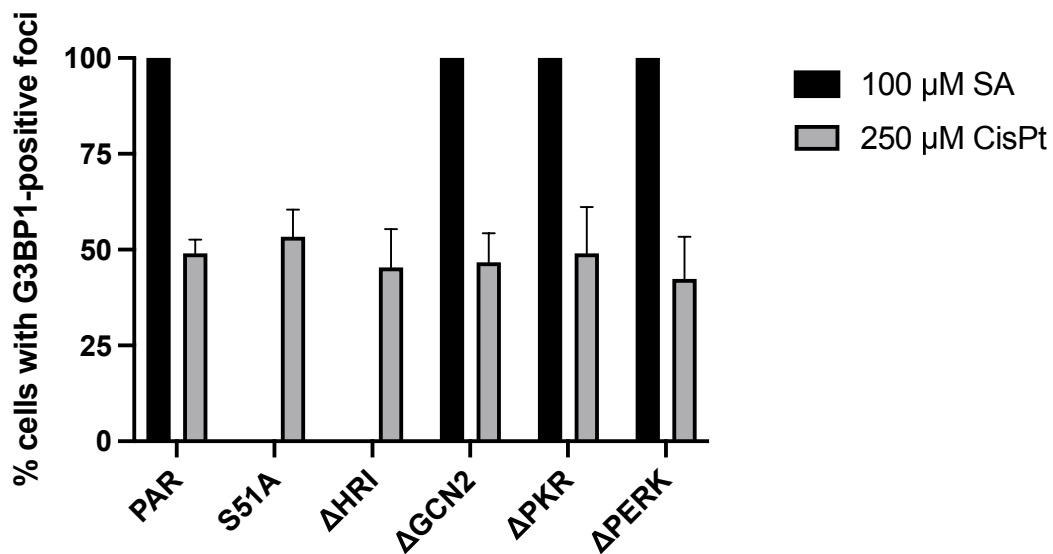**Figure S4**

**A**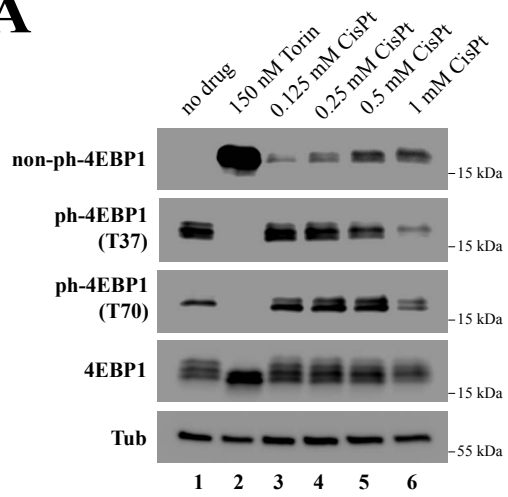**B**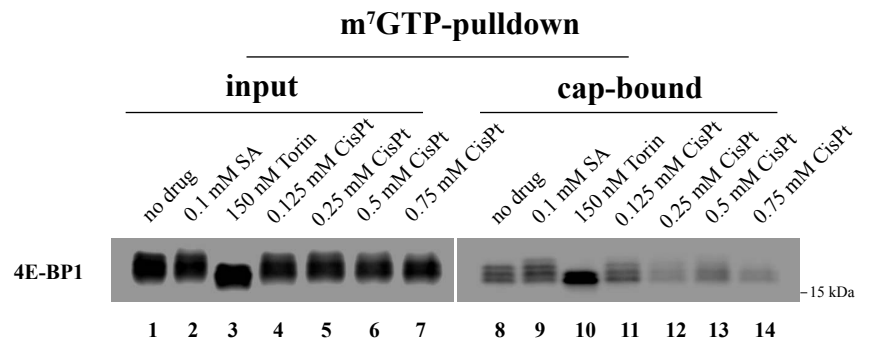**Figure S5**

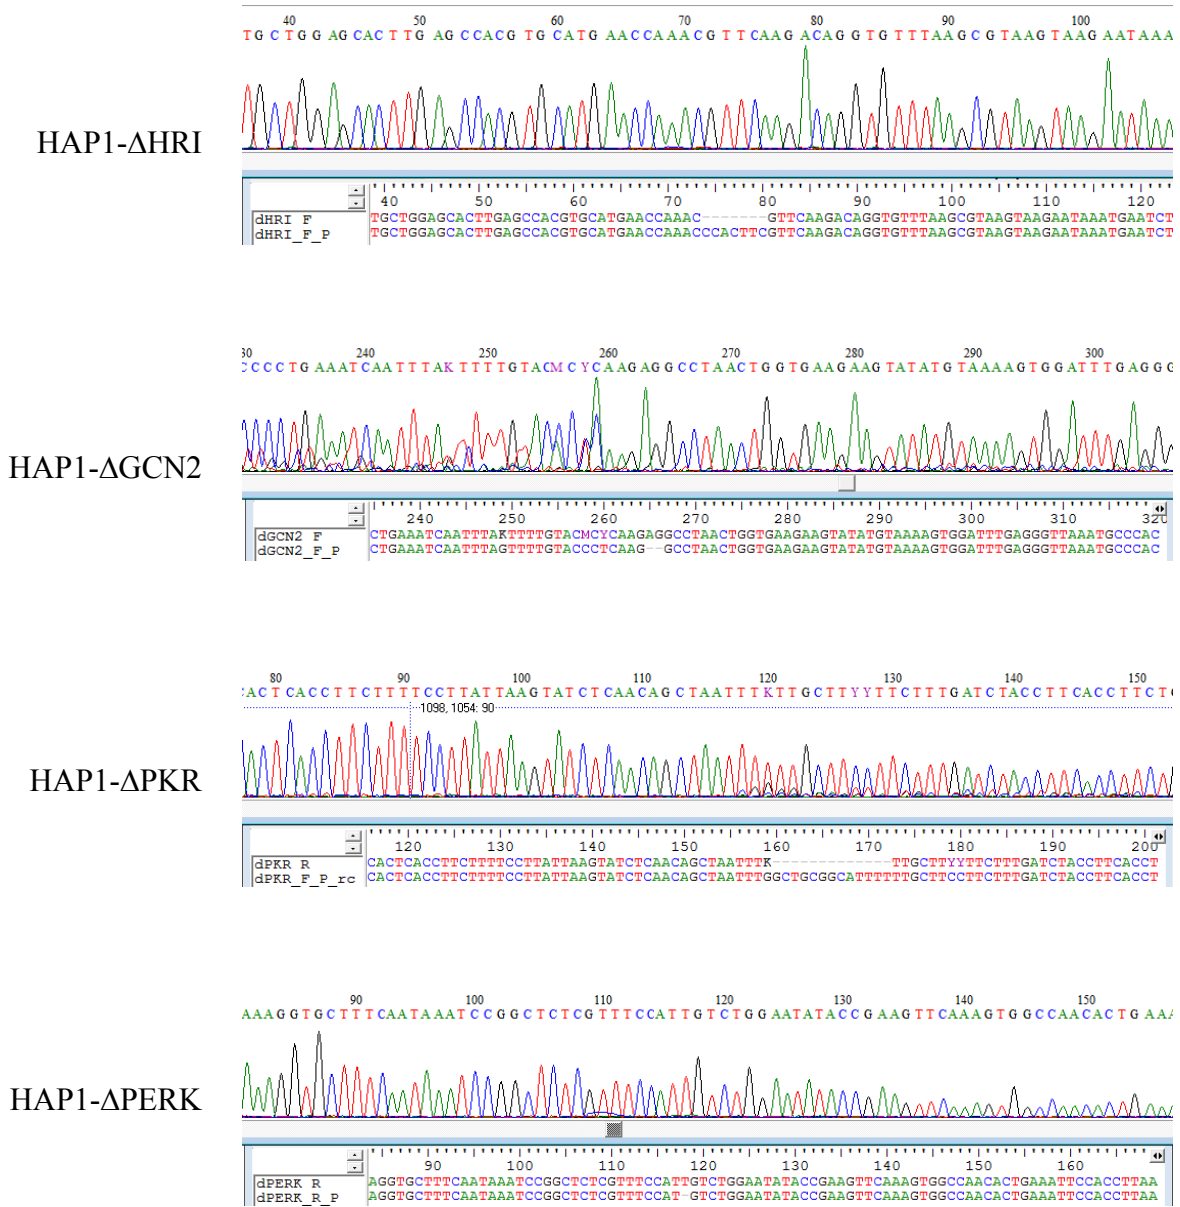

**Figure S6**
